# Supplementary material
Source: ML conference proceedings conference paper supplement (https://openaccess.thecvf.com/content/CVPR2023/html/Li_Source-Free_Video_Domain_CVPR_2023_paper.html)
Supplement: Supplementary file 1 [file Li_Source-Free_Video_Domain_CVPR_2023_supplemental.pdf]

# Supplementary Materials for Source-Free Video Domain Adaptation with Spatial-Temporal-Historical Consistency Learning

Kai Li, Deep Patel, Erik Kruus, Martin Renqiang Min  
NEC Labs, America

{kaili, dpatel, kruus, renqiang}@nec-labs.com

## 1. More Experimental Details

Here we introduce more details about the experiments.

### 1.1. Standard SFVDA

We follow the protocols of ATCoN [3] to learn the source models. Specifically, we adopt Temporal Relation Network (TRN) [4] as our action recognition model which uses ResNet-50 [1] as the frame feature extractor and a one-layer MLP as the temporal feature extractor. The temporal features are processed by a Batch Normalization (BN) layer and an additional fully connected layer before they are sent to the last fully connected layer for predictions. We initialize the frame feature extractor ResNet-50 with weights pre-trained on ImageNet. We train the model with 100 epochs at an initial learning rate of 0.005 and set the learning rate of the frame feature extractor to be 1/10 of the other randomly initialized layers. After learning the source models, we adapt them with unlabeled target videos following the procedures described in the main text.

### 1.2. Partial Domain Adaptation (PDA)

For the PDA setting, everything is the same as the standard setting except that we remove the class-balancing term in the IM loss. We still learn to adapt the same source model using exactly the same strategy though there are less classes in the target domain. For the evaluation benchmark, as introduced in the main text, we utilize the *UCF101* and *HMDB51* datasets. We collect 2,780 videos from the 14 common classes<sup>1</sup>. The number training/test samples from the two datasets are shown in Table 1.

### 1.3. Open-Set Domain Adaptation (OSDA)

We use the same datasets as the PDA setting for the OSDA experiments. The difference is that we choose the

<sup>1</sup>Although the same datasets as the standard SFVDA setting are used, the granularity of action categories is different, which results in more categories.

|             | #Class (Src/Trgt) | #Training/test                     |
|-------------|-------------------|------------------------------------|
| <i>PDA</i>  | 14/7              | (1, 323/529) - (489/209)           |
| <i>OSDA</i> | 7/14              | (657/265) - (979/979) <sup>†</sup> |

Table 1. Statistics of the partial domain adaptation (PDA) and open-set domain adaptation (OSDA) benchmarks. <sup>†</sup>Training videos are used for test. Note this does not violate the basic evaluation rules as the label of training data is not used for training.

first (according to alphabetically sorted class names) 7 categories from *UCF101* to train the source model and adapt it using all 14 classes from the *HMDB51*. Table 1 shows the statistical numbers. For both source model training, we use the same training protocols as for the standard SFVDA setting. For the adaptation process, we adopt the strategy proposed in [2] to exclude samples from unknown classes for calculating the loss. Specifically, for every 15 iterations, we perform inference on the training data with the model  $H$ , producing the prediction  $\mathbf{P} = \{\mathbf{p}_i\}_i^M$  where  $\mathbf{p}_i = H(\mathbf{U}_i)$ . Then, we apply K-Means clustering on the entropy of the predictions, i.e.,

$$\{C_k\}_{k=1}^2, \{L_i\}_{i=1}^M = \text{K} - \text{Mean}(\mathcal{E}), \quad (1)$$

where  $\mathcal{E} = \{e_i\}_{i=1}^M$  with  $e_i = -\sum_j \mathbf{p}_i^j \log \mathbf{p}_i^j$ ,  $C_k (k = 0, 1)$  is the cluster centers for known classes and unknown classes, and  $L_i$  is an indicator specifying which cluster each sample belongs to. We regard  $C_k$  as a known class center if  $C_k < \frac{1}{M} \sum_{e_i \sim E} e_i$  because known class samples should be more confidently predicted and hence have smaller entropy. Then, samples assigning to  $C_k$  are regarded as known class samples and used for loss calculation; samples assigned to the other cluster are excluded.

### 1.4. Black-Box Domain Adaptation (BBDA)

We adopt a simple two-step approach to extend our method to the BBDA setting. We first train a student model from scratch using the black-box model as the teacher via

|                     | #Class | #Training/test                                                                                    |
|---------------------|--------|---------------------------------------------------------------------------------------------------|
| <i>UCF-HMDB</i>     | 12     | (1, 438/571) - (840/360)                                                                          |
| <i>UCF-Kinetics</i> | 23     | (2, 145/851) - (19, 104/1, 961)                                                                   |
| <i>Jester</i>       | 7      | (45, 899/5, 599) - (45, 827/5, 588)                                                               |
| <i>DailyDA</i>      | 8      | <b>A:</b> (2, 776/1, 289) - <b>H:</b> (560/240) - <b>M:</b> (4, 000/400) - <b>K:</b> (8, 959/725) |

Table 2. Statistics of the benchmarks.

|                 | C1   | C2   | C3   | C4   | C5  | C6   | C7  | C8   | C9   | C10  | C11  | C12  | Avg. |
|-----------------|------|------|------|------|-----|------|-----|------|------|------|------|------|------|
| <i>UCF→HMDB</i> |      |      |      |      |     |      |     |      |      |      |      |      |      |
| TRN (source)    | 100  | 80.0 | 96.7 | 36.7 | 100 | 73.3 | 100 | 96.7 | 96.7 | 93.3 | 93.3 | 20.0 | 82.2 |
| SHOT            | 90.0 | 90.0 | 96.7 | 53.3 | 100 | 56.7 | 100 | 96.7 | 96.7 | 93.3 | 93.3 | 16.7 | 82.2 |
| ATCoN           | 83.3 | 86.7 | 100  | 50.0 | 100 | 76.7 | 100 | 96.7 | 93.3 | 93.3 | 93.3 | 46.7 | 85.6 |
| STHC (ours)     | 100  | 73.3 | 97.2 | 82.7 | 100 | 76.3 | 100 | 97.2 | 100  | 93.3 | 93.3 | 78.8 | 90.9 |
| <i>HMDB→UCF</i> |      |      |      |      |     |      |     |      |      |      |      |      |      |
| TRN (source)    | 92.0 | 97.1 | 92.3 | 100  | 100 | 77.6 | 100 | 100  | 100  | 97.1 | 85.4 | 36.1 | 88.1 |
| SHOT            | 84.0 | 100  | 94.9 | 100  | 100 | 46.4 | 100 | 92.1 | 100  | 100  | 100  | 36.1 | 81.2 |
| ATCoN           | 89.3 | 100  | 100  | 100  | 100 | 68.0 | 100 | 94.7 | 100  | 100  | 100  | 83.3 | 90.2 |
| STHC (ours)     | 93.3 | 100  | 100  | 100  | 100 | 69.6 | 100 | 100  | 100  | 97.1 | 100  | 97.2 | 92.1 |

Table 3. Detailed results on the *UCF – HMDB* benchmark. C1~C12 represent the 12 classes from the datasets.

knowledge distillation on unlabeled target samples. To simplify this process, we use the same procedures as we train the source models, but replace the cross-entropy loss with the KL-divergence loss, as

$$L_{\text{div}} = \mathbb{E}_{\mathbf{U} \sim \mathcal{U}} [\text{KLD}(p^s(\mathbf{U}), p^t(\mathbf{U}))], \quad (2)$$

where  $p^s(\mathbf{U})$  and  $p^t(\mathbf{U})$  are the predictions by the student model and teacher model, respectively. With the intermediate source model, we perform adaptation using the same practices as adapting a standard source model.

## 2. Benchmark Details

Table 2 shows the statistics of the four benchmarks employed for experiments.

## 3. Complete Results with Per-class Accuracy

In the main text, we show the average accuracy for most experiments to save space. For reference, Tables 3-11 show the complete results with per-class accuracy provided.

## References

- [1] Kaiming He, Xiangyu Zhang, Shaoqing Ren, and Jian Sun. Deep residual learning for image recognition. In *CVPR*, 2016. 1
- [2] Jian Liang, Dapeng Hu, and Jiashi Feng. Do we really need to access the source data? source hypothesis transfer for unsupervised domain adaptation. In *ICML*, 2020. 1
- [3] Yuecong Xu, Jianfei Yang, Haozhi Cao, Keyu Wu, Min Wu, and Zhenghua Chen. Source-free video domain adaptation by learning temporal consistency for action recognition. In *ECCV*, 2022. 1

- [4] Bolei Zhou, Alex Andonian, Aude Oliva, and Antonio Torralba. Temporal relational reasoning in videos. In *ECCV*, 2018. 1

|      | <i>Kinetics</i> → <i>UCF</i> |      |       |             | <i>UCF</i> → <i>Kinetics</i> |      |       |             |
|------|------------------------------|------|-------|-------------|------------------------------|------|-------|-------------|
|      | TRN (source)                 | SHOT | ATCoN | STHC (ours) | TRN (source)                 | SHOT | ATCoN | STHC (ours) |
| C1   | 87.8                         | 95.1 | 95.1  | 95.1        | 80.0                         | 80.0 | 80.0  | 80.0        |
| C2   | 93.0                         | 88.3 | 86.0  | 83.7        | 89.7                         | 97.4 | 100   | 94.9        |
| C3   | 100                          | 97.1 | 94.3  | 100         | 100                          | 90.0 | 95.0  | 95.0        |
| C4   | 97.4                         | 97.4 | 100   | 100         | 100                          | 100  | 100   | 100         |
| C5   | 100                          | 100  | 97.7  | 100         | 100                          | 100  | 100   | 100         |
| C6   | 100                          | 100  | 100   | 100         | 76.2                         | 95.2 | 95.2  | 100         |
| C7   | 100                          | 100  | 100   | 100         | 100                          | 100  | 94.1  | 100         |
| C8   | 100                          | 100  | 100   | 100         | 31.1                         | 84.4 | 80.0  | 68.9        |
| C9   | 97.5                         | 100  | 100   | 100         | 95.3                         | 14.0 | 100   | 100         |
| C10  | 88.9                         | 100  | 100   | 100         | 50.0                         | 50.0 | 50.0  | 50.0        |
| C11  | 92.3                         | 87.2 | 92.3  | 92.3        | 76.2                         | 38.1 | 60.3  | 82.5        |
| C12  | 34.3                         | 68.6 | 94.3  | 100         | 0                            | 0    | 0     | 0           |
| C13  | 91.7                         | 91.7 | 94.4  | 91.7        | 100                          | 100  | 50.0  | 100         |
| C14  | 95.1                         | 100  | 97.6  | 97.6        | 0                            | 0    | 100   | 100         |
| C15  | 100                          | 100  | 100   | 100         | 92.9                         | 92.9 | 92.9  | 100         |
| C16  | 100                          | 100  | 96.9  | 96.9        | 100                          | 100  | 100   | 100         |
| C17  | 82.5                         | 90.0 | 85.0  | 95.0        | 90.3                         | 88.7 | 88.7  | 90.3        |
| C18  | 100                          | 100  | 100   | 100         | 40.0                         | 60.0 | 70.0  | 60.0        |
| C19  | 100                          | 100  | 100   | 100         | 100                          | 100  | 100   | 100         |
| C20  | 100                          | 100  | 96.4  | 100         | 100                          | 100  | 100   | 100         |
| C21  | 83.7                         | 69.4 | 71.4  | 71.4        | 83.3                         | 83.3 | 83.3  | 83.3        |
| C22  | 100                          | 100  | 100   | 100         | 81.8                         | 90.9 | 90.9  | 72.7        |
| C23  | 94.3                         | 100  | 100   | 100         | 100                          | 100  | 100   | 100         |
| Avg. | 92.7                         | 94.1 | 95.3  | 96.1        | 82.5                         | 75.3 | 87.3  | 89.8        |

Table 4. Detailed results on *UCF-Kinetics* benchmark. C1~C23 represent the 23 classes from the datasets.

|            |              | C1   | C2   | C3   | C4   | C5   | C6   | C7   | C8   | Avg. |
|------------|--------------|------|------|------|------|------|------|------|------|------|
| <b>K→A</b> | TRN (source) | 47.2 | 28.0 | 0    | 8.5  | 24.5 | 5.1  | 52.8 | 13.6 | 24.4 |
|            | SHOT         | 37.1 | 12.0 | 0    | 0.2  | 40.6 | 0    | 19.3 | 19.2 | 20.1 |
|            | ATCoN        | 46.5 | 32.0 | 0    | 0    | 8.3  | 0    | 16.0 | 13.0 | 14.6 |
|            | STHC (ours)  | 1.0  | 1.0  | 0    | 0    | 94.4 | 1.1  | 6.9  | 0    | 15.5 |
| <b>K→H</b> | TRN (source) | 80.0 | 70.0 | 0.0  | 80.0 | 90.0 | 0    | 46.7 | 33.3 | 50.0 |
|            | SHOT         | 86.7 | 40.0 | 13.3 | 86.7 | 76.7 | 6.7  | 30.0 | 46.7 | 49.1 |
|            | ATCoN        | 83.3 | 70.0 | 0.0  | 86.7 | 93.3 | 10.0 | 23.3 | 26.7 | 49.1 |
|            | STHC (ours)  | 73.3 | 67.0 | 0.0  | 87.3 | 100  | 10.0 | 23.3 | 33.3 | 48.7 |
| <b>K→M</b> | TRN (source) | 26.0 | 42.0 | 40.0 | 36.0 | 50.0 | 4.0  | 42.0 | 20.0 | 32.5 |
|            | SHOT         | 26.0 | 18.0 | 22.0 | 12.0 | 14.0 | 16.0 | 18.0 | 26.0 | 36.8 |
|            | ATCoN        | 34.0 | 46.0 | 48.0 | 46.0 | 34.0 | 10.0 | 22.0 | 42.0 | 35.8 |
|            | STHC (ours)  | 36.0 | 28.0 | 44.0 | 40.0 | 44.0 | 18.0 | 20.0 | 48.0 | 34.8 |
| <b>M→A</b> | TRN (source) | 73.0 | 40.8 | 1.1  | 45.8 | 17.2 | 0    | 55.7 | 7.3  | 31.2 |
|            | SHOT         | 51.6 | 0    | 53.8 | 0    | 0    | 28.7 | 9.0  | 2.8  | 16.1 |
|            | ATCoN        | 57.2 | 0    | 21.5 | 0    | 10.4 | 0    | 21.7 | 0.6  | 13.6 |
|            | STHC (ours)  | 69.1 | 0    | 0    | 0    | 9.3  | 16.9 | 36.3 | 1.0  | 18.4 |
| <b>M→H</b> | TRN (source) | 100  | 6.7  | 3.3  | 90.0 | 86.7 | 26.7 | 73.3 | 20.0 | 50.8 |
|            | SHOT         | 93.3 | 20.0 | 36.7 | 83.3 | 86.7 | 36.7 | 40.0 | 30.0 | 53.3 |
|            | ATCoN        | 96.7 | 13.3 | 13.3 | 90.0 | 90.0 | 53.3 | 66.7 | 33.3 | 58.3 |
|            | STHC (ours)  | 97.2 | 17.3 | 13.1 | 83.3 | 100  | 57.1 | 47.4 | 37.3 | 56.3 |
| <b>M→K</b> | TRN (source) | 58.3 | 77.3 | 95.5 | 83.3 | 84.3 | 28.4 | 84.4 | 50.0 | 75.9 |
|            | SHOT         | 0    | 100  | 100  | 100  | 23.7 | 0    | 76.6 | 0    | 42.8 |
|            | ATCoN        | 94.3 | 90.3 | 100  | 25.0 | 43.7 | 97.2 | 85.1 | 0    | 71.7 |
|            | STHC (ours)  | 97.1 | 90.3 | 100  | 100  | 62.3 | 68.9 | 85.1 | 0    | 76.6 |
| <b>H→A</b> | TRN (source) | 59.7 | 0    | 2.2  | 1.3  | 3.1  | 25.3 | 34.9 | 0    | 17.4 |
|            | SHOT         | 0    | 0    | 0    | 56.9 | 0    | 29.8 | 19.3 | 2.2  | 14.3 |
|            | ATCoN        | 0    | 0    | 0    | 9.2  | 0.5  | 29.8 | 26.4 | 2.8  | 10.2 |
|            | STHC (ours)  | 0    | 0    | 2.2  | 49.1 | 0    | 0    | 42.3 | 6.1  | 13.8 |
| <b>H→M</b> | TRN (source) | 46.0 | 46.0 | 44.0 | 20.0 | 26.0 | 42.0 | 8.0  | 26.0 | 32.3 |
|            | SHOT         | 16.0 | 42.0 | 68.0 | 44.0 | 38.0 | 20.0 | 12.0 | 38.0 | 35.0 |
|            | ATCoN        | 34.0 | 56.0 | 60.0 | 46.0 | 36.0 | 26.0 | 26.0 | 34.0 | 38.8 |
|            | STHC (ours)  | 30.0 | 48.0 | 60.0 | 44.0 | 42.0 | 20.0 | 24.0 | 50.0 | 39.8 |
| <b>H→K</b> | TRN (source) | 31.9 | 24.4 | 37.9 | 91.7 | 79.9 | 7.5  | 2.8  | 58.3 | 43.7 |
|            | SHOT         | 5.7  | 93.5 | 75.0 | 100  | 40.7 | 0    | 4.3  | 1    | 36.9 |
|            | ATCoN        | 62.9 | 93.5 | 97.2 | 100  | 42.2 | 0    | 6.4  | 1    | 45.8 |
|            | STHC (ours)  | 41.7 | 80.7 | 93.9 | 91.7 | 56.7 | 0    | 3.7  | 66.7 | 50.1 |
| <b>A→H</b> | TRN (source) | 0    | 0    | 43.3 | 3.3  | 56.7 | 30.0 | 10.0 | 0    | 17.9 |
|            | SHOT         | 70.0 | 13.3 | 30.0 | 90.0 | 50.0 | 0    | 6.7  | 13.3 | 34.2 |
|            | ATCoN        | 90.0 | 6.7  | 16.7 | 90.0 | 56.7 | 13.3 | 3.3  | 43.3 | 40.0 |
|            | STHC (ours)  | 70.0 | 27.1 | 13.3 | 87.2 | 87.4 | 26.7 | 27.2 | 20.0 | 44.6 |
| <b>A→M</b> | TRN (source) | 8.0  | 4.0  | 10.0 | 4.0  | 32.0 | 48.0 | 28.0 | 12.0 | 18.3 |
|            | SHOT         | 32.0 | 12.0 | 60.0 | 24.0 | 34.0 | 30.0 | 12.0 | 18.0 | 27.3 |
|            | ATCoN        | 40.0 | 26.0 | 36.0 | 36.0 | 22.0 | 28.0 | 12.0 | 22.0 | 27.3 |
|            | STHC (ours)  | 48.0 | 20.0 | 34.0 | 30.0 | 32.0 | 22.0 | 16.0 | 14.0 | 27.3 |
| <b>A→K</b> | TRN (source) | 0    | 4.2  | 3.0  | 0    | 39.9 | 40.3 | 18.3 | 8.3  | 22.3 |
|            | SHOT         | 57.1 | 6.5  | 97.2 | 100  | 33.3 | 0    | 66.0 | 0    | 41.8 |
|            | ATCoN        | 71.4 | 0    | 0    | 75.0 | 39.3 | 0    | 76.6 | 100  | 36.8 |
|            | STHC (ours)  | 86.1 | 0    | 0    | 100  | 54.3 | 0    | 78.4 | 100  | 44.7 |

Table 5. Detailed results on the *DailyDA* benchmark. “**K**”, “**A**”, “**H**”, and “**M**” are short for the *Kinetics*, *HMDB51*, *ARID*, and *Moments-in-Time*, respectively. C1~C8 represent the 8 classes from the datasets.

|              | C1   | C2   | C3   | C4   | C5   | C6   | C7  | Avg. |
|--------------|------|------|------|------|------|------|-----|------|
| TRN (source) | 73.3 | 16.7 | 80.0 | 100  | 100  | 46.7 | 100 | 73.8 |
| SHOT         | 46.7 | 20.2 | 60.0 | 96.7 | 90.3 | 43.3 | 100 | 65.2 |
| ATCoN        | 60.0 | 40.3 | 76.7 | 100  | 80.1 | 46.7 | 100 | 71.9 |
| STHC (ours)  | 80.0 | 20.2 | 82.9 | 100  | 89.8 | 50.1 | 100 | 75.2 |

Table 6. Detailed results for  $UCF \rightarrow HMDB$  in the partial domain adaptation (PDA) setting.

|              | C1   | C2   | C3   | C4   | C5   | C6   | C7   | Unknown | OS   | OS*  |
|--------------|------|------|------|------|------|------|------|---------|------|------|
| TRN (source) | 81.4 | 50.0 | 84.3 | 2.9  | 42.9 | 97.1 | 68.6 | 66.5    | 61.7 | 61.0 |
| SHOT         | 88.6 | 85.7 | 95.7 | 38.6 | 5.7  | 92.9 | 92.9 | 3.9     | 63.0 | 71.4 |
| ATCoN        | 98.6 | 87.1 | 98.6 | 0    | 47.1 | 98.6 | 91.4 | 5.3     | 65.8 | 74.5 |
| STHC (ours)  | 85.7 | 84.3 | 80.0 | 5.7  | 74.3 | 100  | 87.1 | 54.7    | 69.5 | 73.9 |

Table 7. Detailed results for  $UCF \rightarrow HMDB$  in the open-set domain adaptation (OSDA) setting. “Unknown” represents classes absent in the source domain. OS and OS\* denote mean accuracy over all classes and mean accuracy over known classes, respectively.

|                           | C1   | C2   | C3   | C4   | C5  | C6   | C7   | C8   | C9   | C10  | C11  | C12  | Avg. |
|---------------------------|------|------|------|------|-----|------|------|------|------|------|------|------|------|
| TRN (source)              | 100  | 80.0 | 96.7 | 36.7 | 100 | 73.3 | 100  | 96.7 | 96.7 | 93.3 | 93.3 | 20.0 | 82.2 |
| TRN (source) <sup>†</sup> | 93.3 | 86.7 | 96.7 | 40.0 | 100 | 60.1 | 100  | 96.7 | 90.2 | 93.3 | 96.7 | 20.1 | 81.1 |
| SHOT                      | 80.0 | 93.3 | 100  | 53.3 | 100 | 80.2 | 100  | 96.7 | 96.7 | 93.3 | 93.3 | 50.2 | 86.4 |
| ATCoN                     | 63.3 | 90.0 | 100  | 23.3 | 100 | 66.7 | 80.2 | 96.7 | 93.3 | 90.0 | 96.7 | 13.3 | 76.7 |
| STHC (ours)               | 90.1 | 83.3 | 97.4 | 70.2 | 100 | 65.9 | 100  | 97.3 | 100  | 93.2 | 93.3 | 65.7 | 87.8 |

Table 8. Detailed results for  $UCF \rightarrow HMDB$  in the black-box domain adaptation (BBDA) setting.

|                             | C1   | C2   | C3   | C4   | C5  | C6   | C7  | C8   | C9   | C10  | C11  | C12  | Avg. |
|-----------------------------|------|------|------|------|-----|------|-----|------|------|------|------|------|------|
| w/o spatial consistency     | 100  | 83.1 | 93.3 | 90.1 | 100 | 72.4 | 100 | 97.1 | 100  | 83.3 | 93.3 | 41.1 | 87.8 |
| w/o temporal consistency    | 93.1 | 83.1 | 97.2 | 67.2 | 100 | 72.4 | 100 | 97.1 | 93.3 | 97.1 | 93.3 | 76.4 | 88.9 |
| w/o historical consistency  | 100  | 90.0 | 93.3 | 80.0 | 100 | 66.3 | 100 | 97.1 | 100  | 86.3 | 93.3 | 71.9 | 89.8 |
| w/o training the classifier | 100  | 80.0 | 93.3 | 76.9 | 100 | 68.9 | 100 | 97.1 | 100  | 92.6 | 96.6 | 51.8 | 88.1 |
| Full Model                  | 100  | 89.8 | 97.2 | 82.5 | 100 | 76.1 | 100 | 97.1 | 97.2 | 92.6 | 93.3 | 65.5 | 90.9 |

Table 9. Detailed results for the ablation study with  $UCF \rightarrow HMDB$ .

|                             | C1   | C2   | C3   | C4   | C5   | C6   | C7   | Avg. |
|-----------------------------|------|------|------|------|------|------|------|------|
| w/o spatial consistency     | 55.2 | 100  | 82.1 | 51.1 | 98.1 | 95.8 | 80.0 | 75.0 |
| w/o temporal consistency    | 56.1 | 99.2 | 84.3 | 24.2 | 96.0 | 98.1 | 78.1 | 70.1 |
| w/o historical consistency  | 44.2 | 99.6 | 76.5 | 63.6 | 99.1 | 96.6 | 92.0 | 76.6 |
| w/o training the classifier | 30.0 | 99.2 | 85.3 | 38.9 | 98.3 | 80.1 | 95.2 | 70.4 |
| Full Model                  | 66.1 | 99.4 | 76.5 | 60.3 | 98.3 | 96.6 | 83.5 | 78.4 |

Table 10. Detailed results for the ablation study with *Jester*.

|                  | C1   | C2   | C3   | C4   | C5  | C6   | C7  | C8   | C9   | C10  | C11  | C12  | Avg. |
|------------------|------|------|------|------|-----|------|-----|------|------|------|------|------|------|
| $\alpha = 0.001$ | 0    | 0    | 0    | 0    | 0   | 100  | 0   | 0    | 0    | 0    | 0    | 0    | 8.2  |
| $\alpha = 0.01$  | 100  | 53.2 | 100  | 60.0 | 100 | 86.3 | 100 | 97.1 | 97.2 | 93.1 | 93.3 | 17.3 | 83.0 |
| $\alpha = 0.1$   | 100  | 73.3 | 97.2 | 82.7 | 100 | 76.3 | 100 | 97.2 | 100  | 93.3 | 93.3 | 78.8 | 90.9 |
| $\alpha = 1$     | 97.1 | 80.1 | 97.2 | 77.3 | 100 | 72.4 | 100 | 97.1 | 100  | 90.1 | 93.3 | 69.4 | 89.2 |
| $\alpha = 10$    | 100  | 77.2 | 92.8 | 70.2 | 100 | 72.4 | 100 | 97.1 | 100  | 93.2 | 93.3 | 69.4 | 88.6 |

Table 11. Detailed results for the sensitivity analysis of  $\alpha$  with  $UCF \rightarrow HMDB$ .
